# Supplementary material
Source: PubMed Central journal article supplement (PMC7727327)
Supplement: NEJMoa2023184_data-sharing.pdf [file NEJMoa2023184_data-sharing.pdf]

## Data Sharing Statement

WHO Solidarity Trial Consortium. Repurposed Antiviral Drugs for Covid-19 — Interim WHO Solidarity Trial Results. N Engl J Med. DOI: 10.1056/NEJMoa2023184.

| Question                                                            | Authors' Response                                                                                                                                                                   |
|---------------------------------------------------------------------|-------------------------------------------------------------------------------------------------------------------------------------------------------------------------------------|
| Will the data collected for your study be made available to others? | Yes                                                                                                                                                                                 |
| Would you like to offer context for your decision?                  | After the trial has ended and its results have been reported, anonymized data sharing will occur as per the Policy Statement on Data Sharing by the World Health Organization (WHO) |
| Which data?                                                         | Anonymized data                                                                                                                                                                     |
| Additional information about data                                   | Individual participant data that underlie the results reported in this article, after de-identification (text, tables, figures, and appendices).                                    |
| How or where can the data be obtained?                              | To be provided later                                                                                                                                                                |
| When will data availability begin?                                  | When final report is published                                                                                                                                                      |
| When will data availability end?                                    | 5 years after final report is published                                                                                                                                             |
| Will any supporting documents be available?                         | Yes                                                                                                                                                                                 |
| Which supporting documents?                                         | Study protocol                                                                                                                                                                      |
| Additional information about supporting documents                   | —                                                                                                                                                                                   |
| How or where can supporting documents be obtained?                  | Protocol available at WHO website                                                                                                                                                   |
| When will supporting documents availability begin?                  | Protocol already available at WHO website                                                                                                                                           |
| When will supporting documents availability end?                    | Access to protocol will be retained for at least 5 years from date of publication of this manuscript                                                                                |
| To whom will data be available?                                     | Proposals for access will be reviewed by the executive group of the international steering committee of the WHO Solidarity trial.                                                   |
| For what type of analysis or purpose?                               | Evidence synthesis/meta-analysis                                                                                                                                                    |
| By what mechanism?                                                  | By contacting corresponding author                                                                                                                                                  |
| Any other restrictions?                                             | In line with WHO policy on data sharing in the context of public health emergencies                                                                                                 |
| Additional information                                              | —                                                                                                                                                                                   |

This statement was posted on December 2, 2020, at [NEJM.org](https://www.nejm.org).
